# Supplementary material for: A novel silver-containing absorbent wound dressing based on spacer fabric
Source: Royal Society of Chemistry journal article supplement (doi:10.1039/c7tb01286a), 2017-01-01
Supplement: c7tb01286a1.pdf [file c7tb01286a1.pdf]

## Supplementary Information

### **Waterproof treatment on spacer fabric**

NUVA N2114 water resistant agent produced by Clariant Ltd was used. The NUVA N2114 solution of concentration 10% was sprayed on the top layer of spacer fabric. A spraying equipment (HD-130, RUIYI, Taiwan) was used at a pressure of 0.4MPa and the moving rate is about 5mm/s. After spraying, the spacer fabrics were cured at 130 °C for 10 min.
